# Supplementary material
Source: Springer Nature journal article supplement (https://www.springermedizin.de/resource/supplementary/12885_2014_5028_MOESM2_ESM.pdf/9468088)

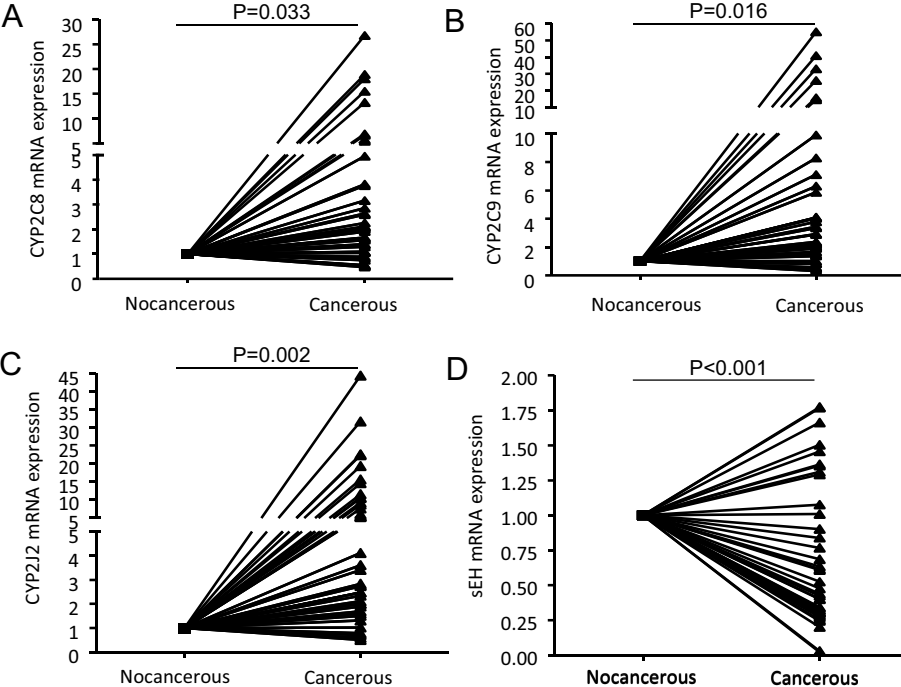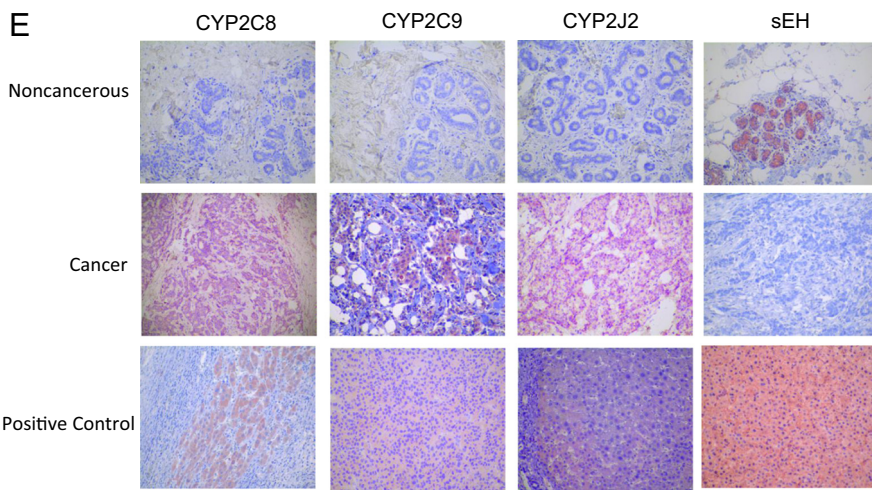

Supplement: MOESM2 [file 9468088]
